# Supplementary material
Source: Springer Nature journal article supplement (https://www.springermedizin.de/resource/supplementary/12889_2011_4032_MOESM4_ESM.pdf/9491260)
Supplement: MOESM4 [file 9491260]

## ENVELOPE OF ADULT DIARRHEA

### MILD CASES\*

95.0%

Mean duration: 2.8 d  
Any dehydration: 5.0%

### MODERATE CASES\*\*

4.95%

Mean duration: 2.8 d  
Any dehydration: 30.1%

### SEVERE CASES^

0.05% of moderate cases

Mean duration: 2.8 d  
Any dehydration: 92.8%

\* Mild cases defined as the proportion of community-based cases without dehydration. Dehydration described by community studies; mean duration estimated by the average across included studies.

\*\* Moderate cases defined as the proportion of community-based cases with any dehydration. Dehydration described by hospital outpatient studies; mean duration estimated by the average across included studies.

^ Severe cases defined as 1% of moderate cases. Dehydration described by hospital inpatient studies; mean duration estimated by the average across included studies.
